# Supplementary material for: Antioxidative Sirt1 and the Keap1-Nrf2 Signaling Pathway Impair Inflammation and Positively Regulate Autophagy in Murine Mammary Epithelial Cells or Mammary Glands Infected with Streptococcus uberis
Source: MDPI journal article supplement (doi:10.3390/antiox13020171), 2024-01-29
Supplement: s1 [file s1]

**Supplementary Data:**

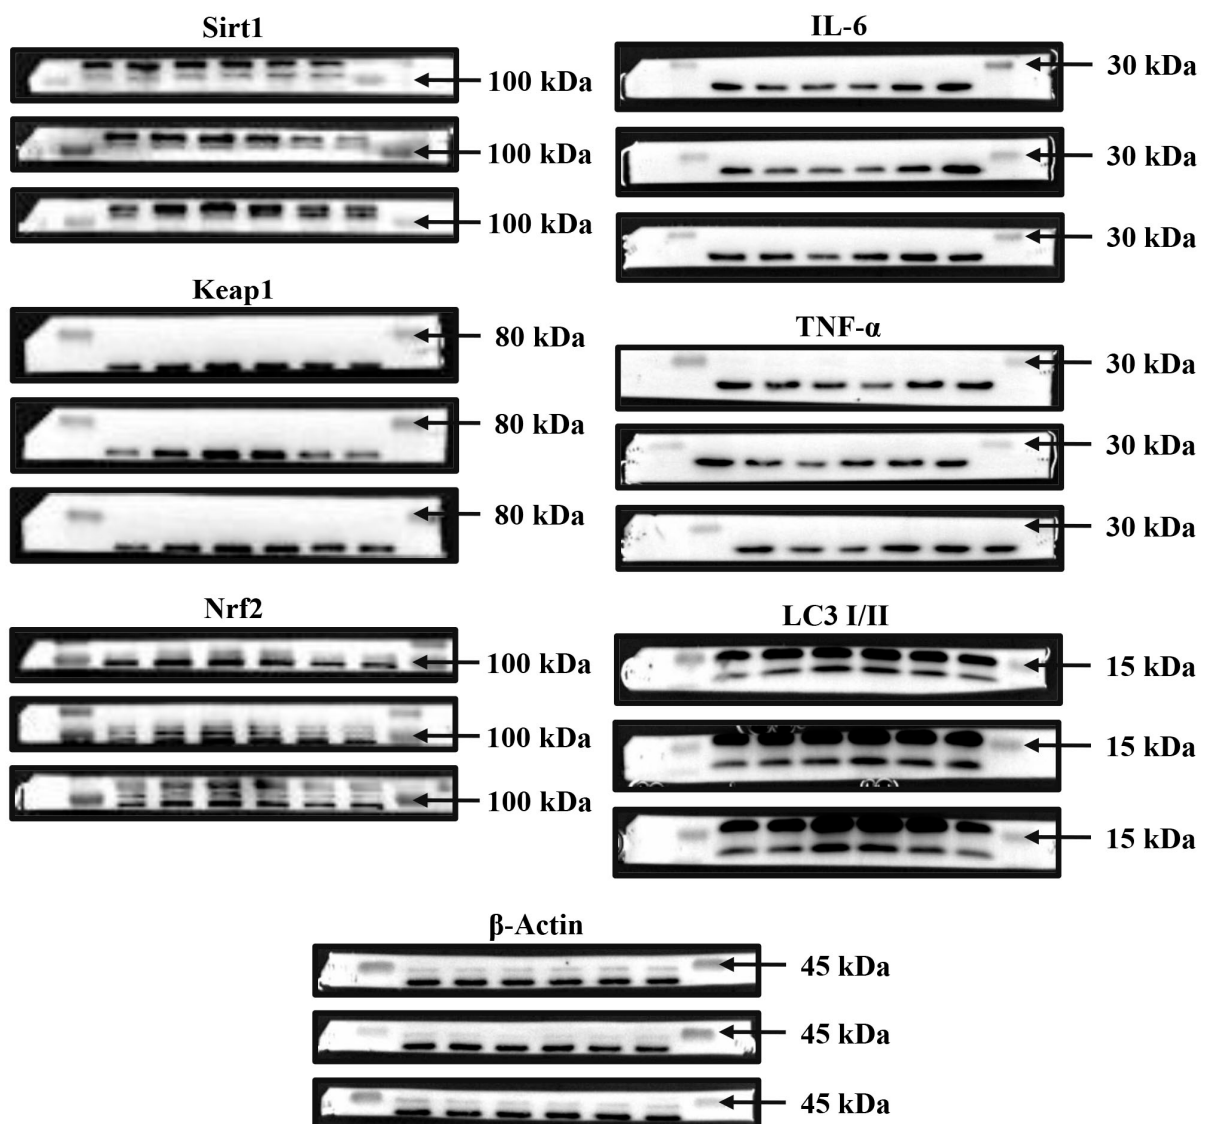

**Fig. S1. The uncropped images of Western blots for Fig. 2A-D**

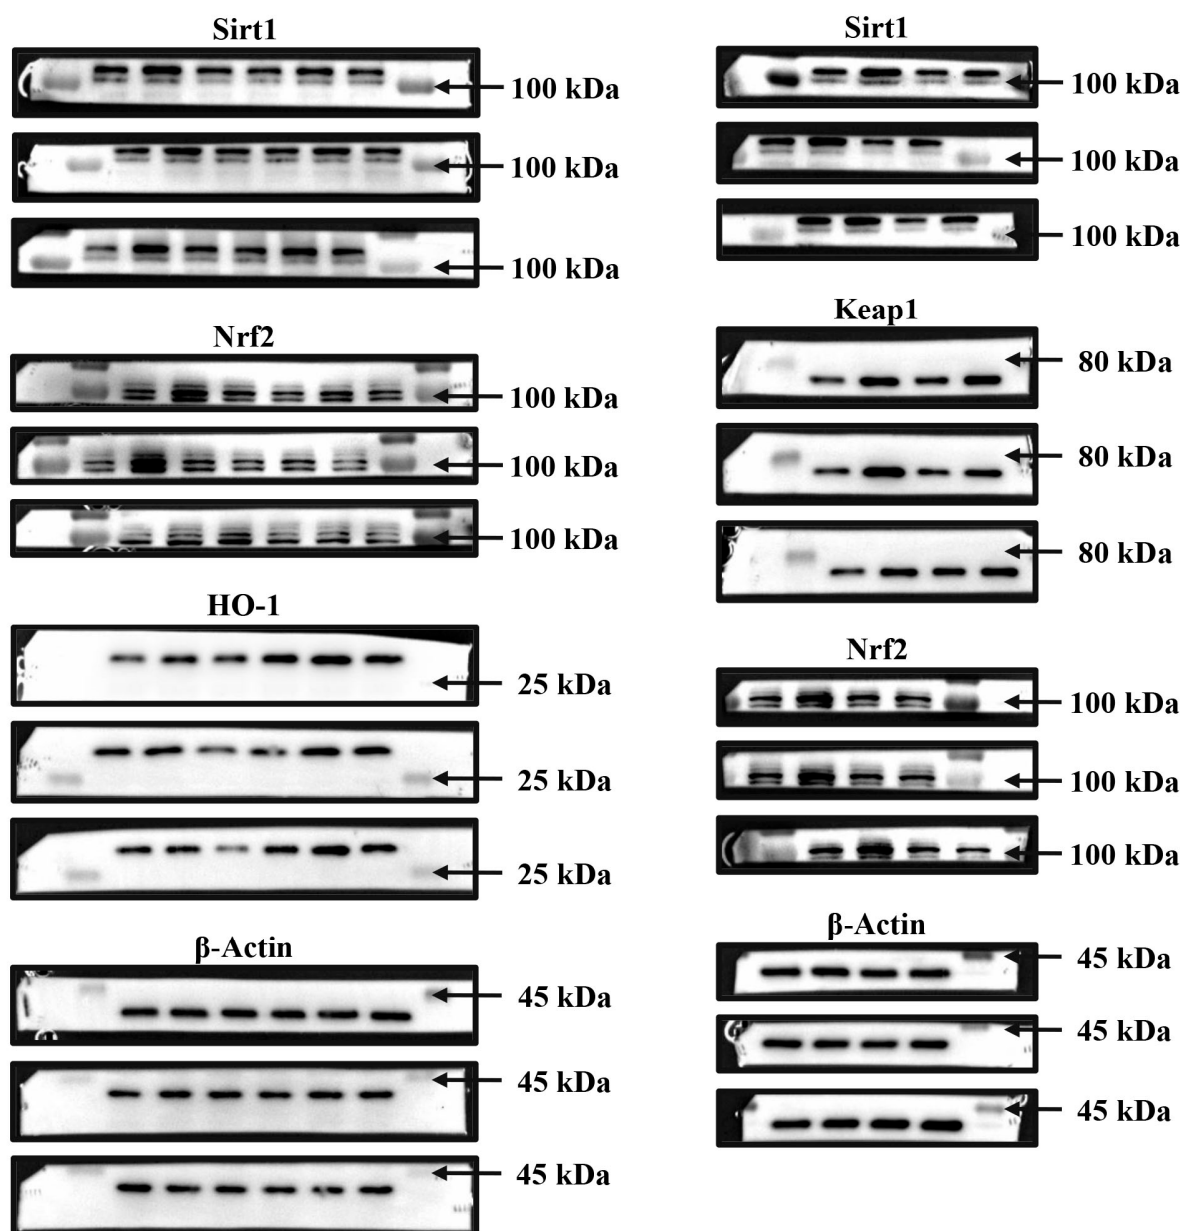

**Fig. S2.** The uncropped images of Western blots for Fig. 3A-D

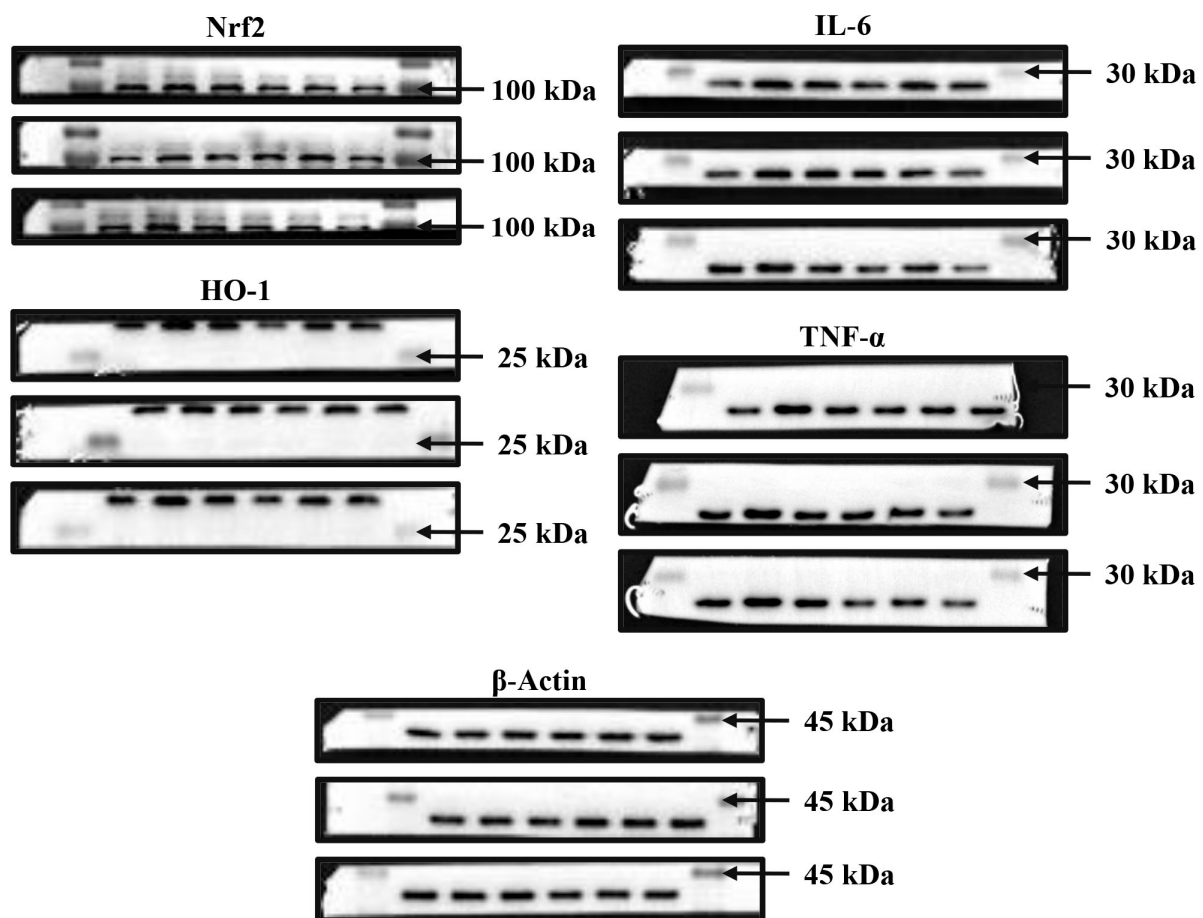

**Fig. S3.** The uncropped images of Western blots for Fig. 4A-B

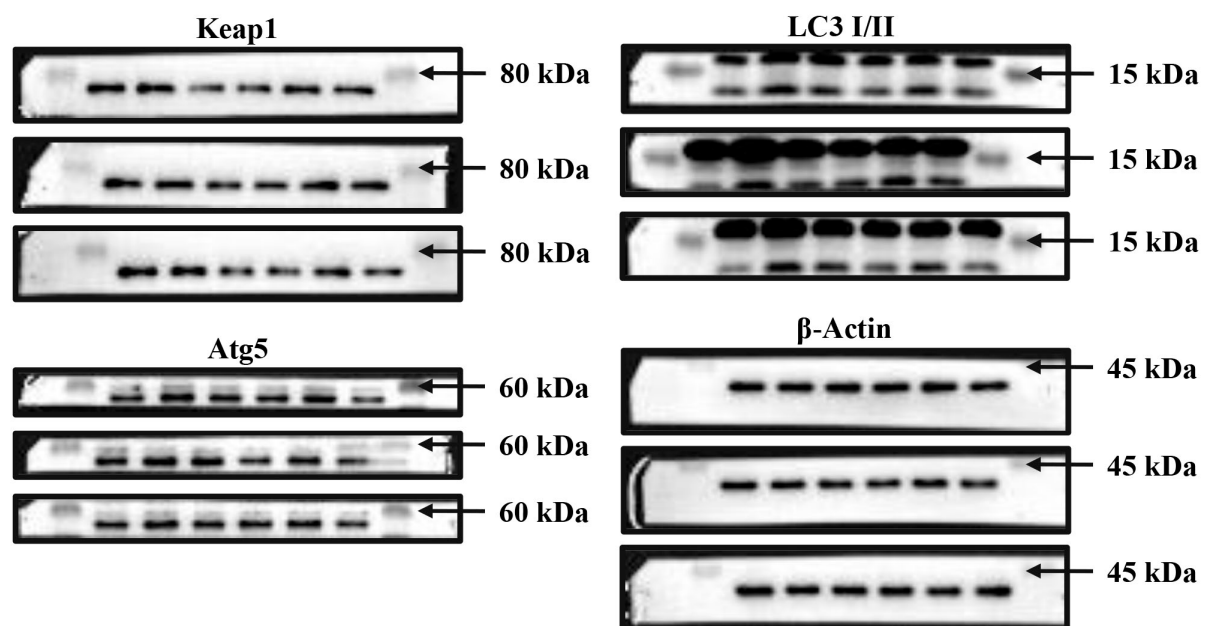

**Fig. S4.** The uncropped images of Western blots for Fig. 5A-B

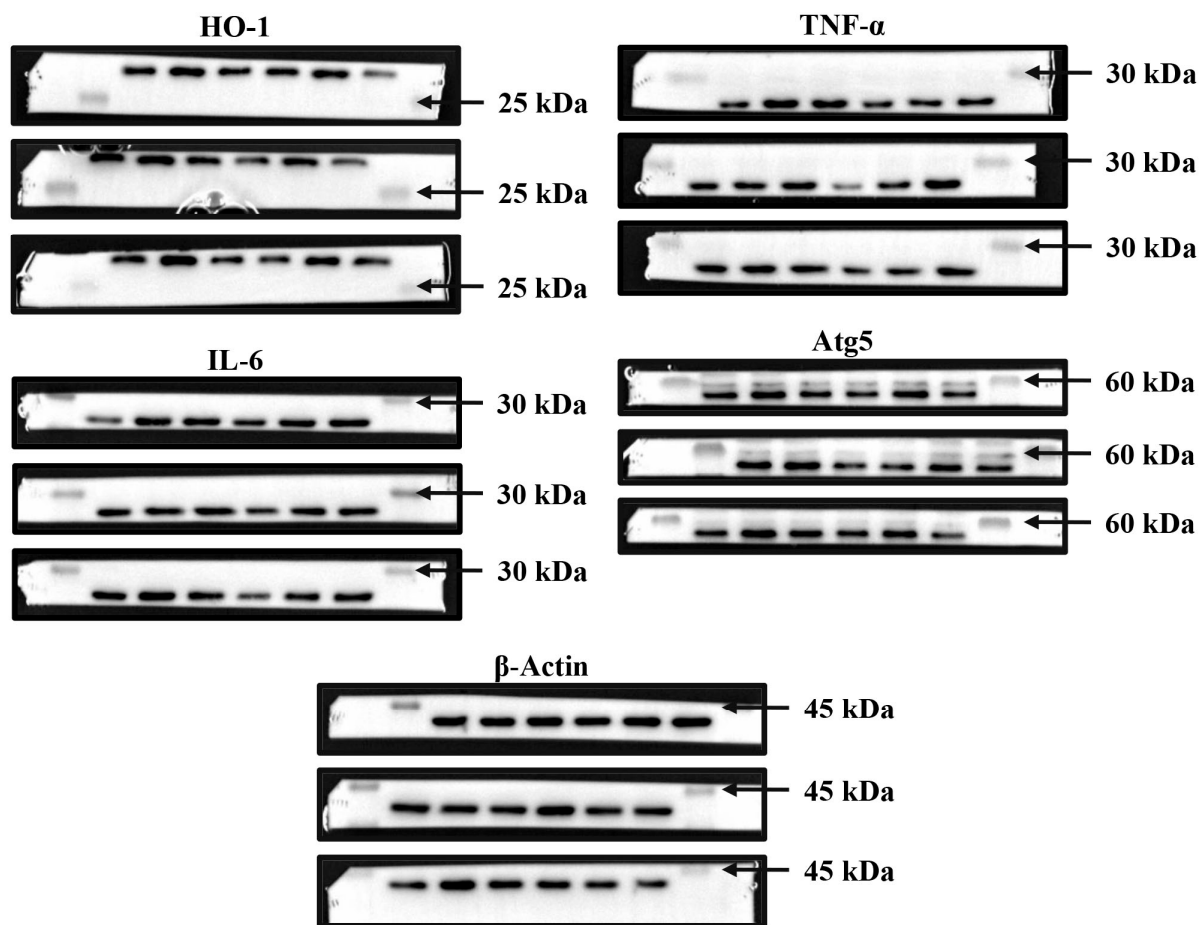

**Fig. S5.** The uncropped images of Western blots for Fig. 6A-B

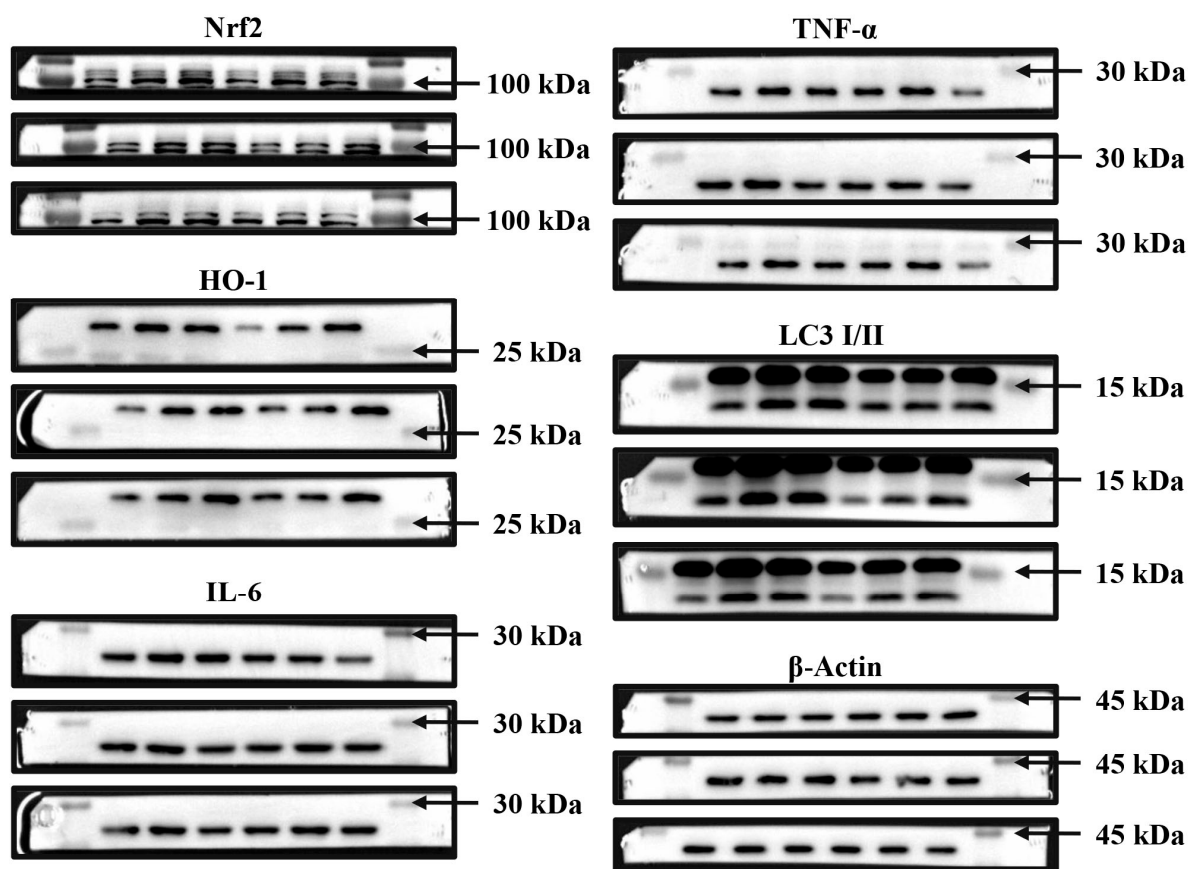

**Fig. S6.** The uncropped images of Western blots for Fig. 7A-B

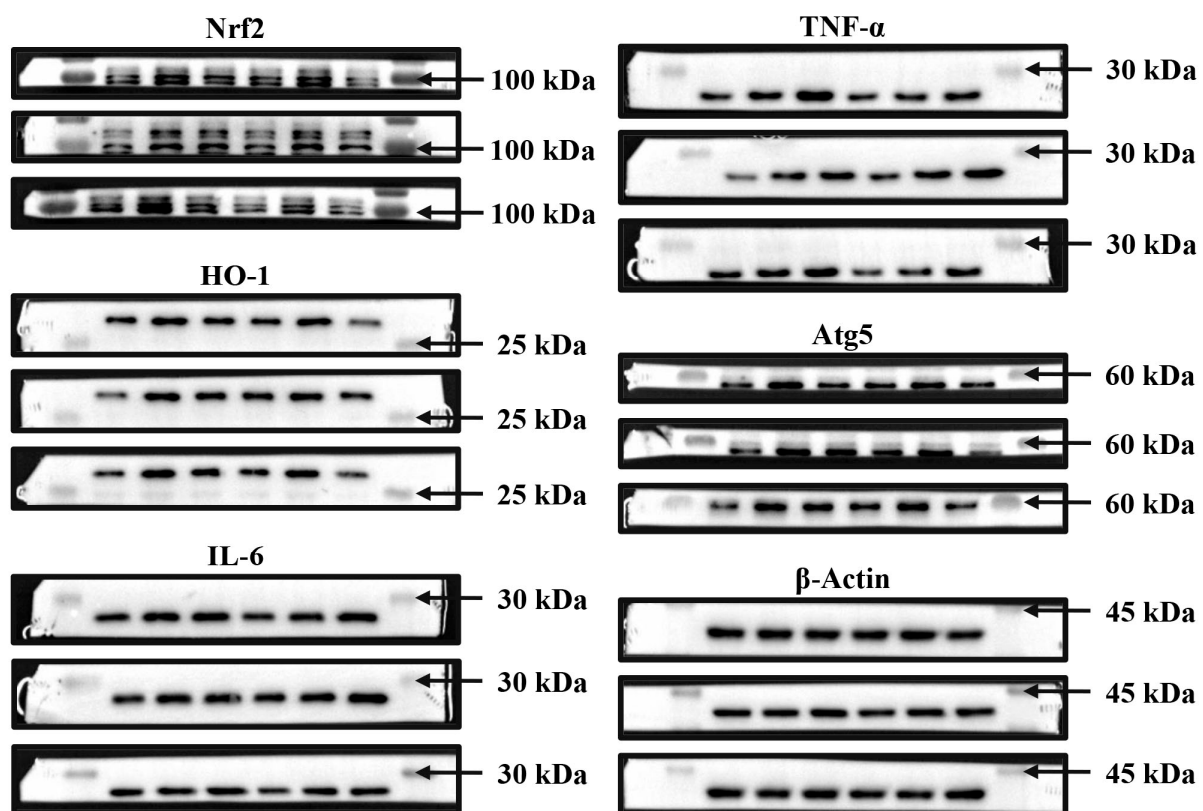

**Fig. S7.** The uncropped images of Western blots for Fig. 8A-B

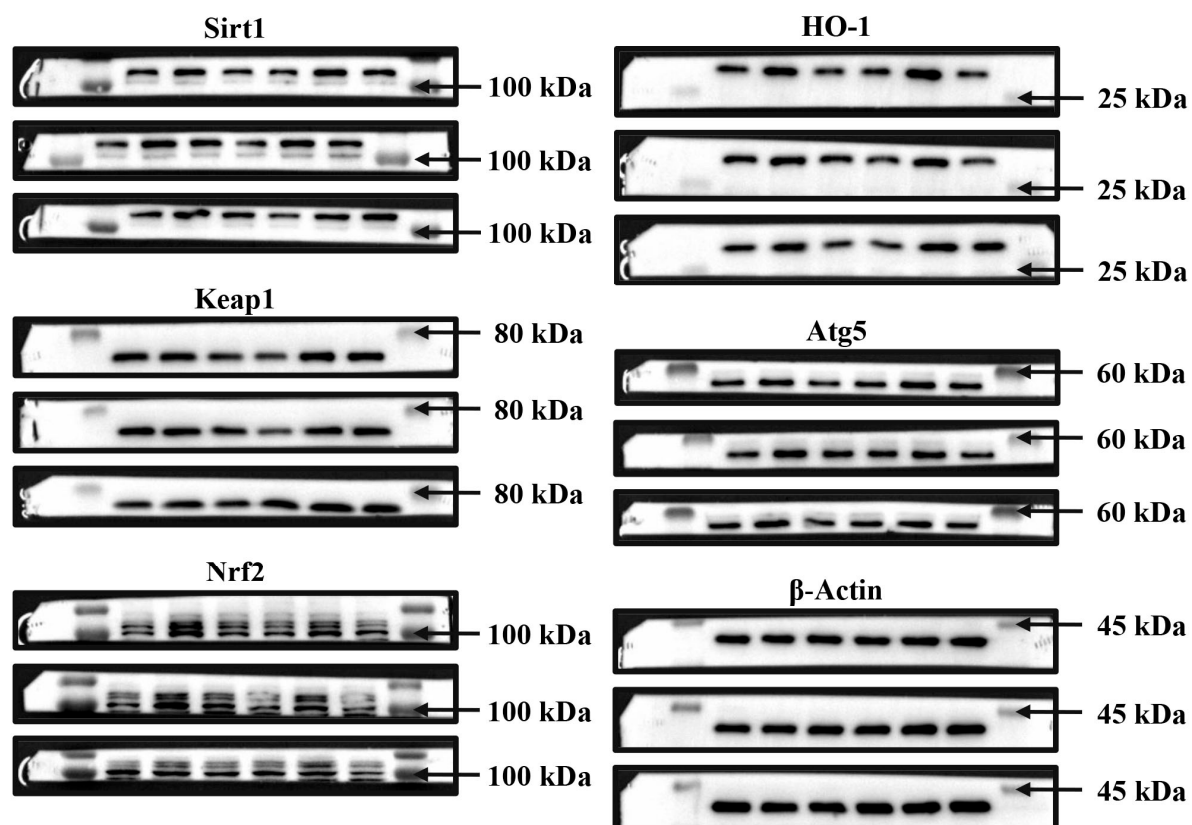

**Fig. S8.** The uncropped images of Western blots for Fig. 9A-B
